# Supplementary material for: Uncovering And Investigating Reasons for Inaccuracies in Vaccine Card Records in Kiyawa LGA Jigawa, Nigeria: A Mixed Method Study
Source: Research Square preprint supplement (doi:10.21203/rs.3.rs-7023550/v1), 2025-07-10
Supplement: Supplementary file 1 [file 9f36f0e6590b90972b67798e.docx]

**Supplementary Figure 1: Participant inclusion flow diagram**


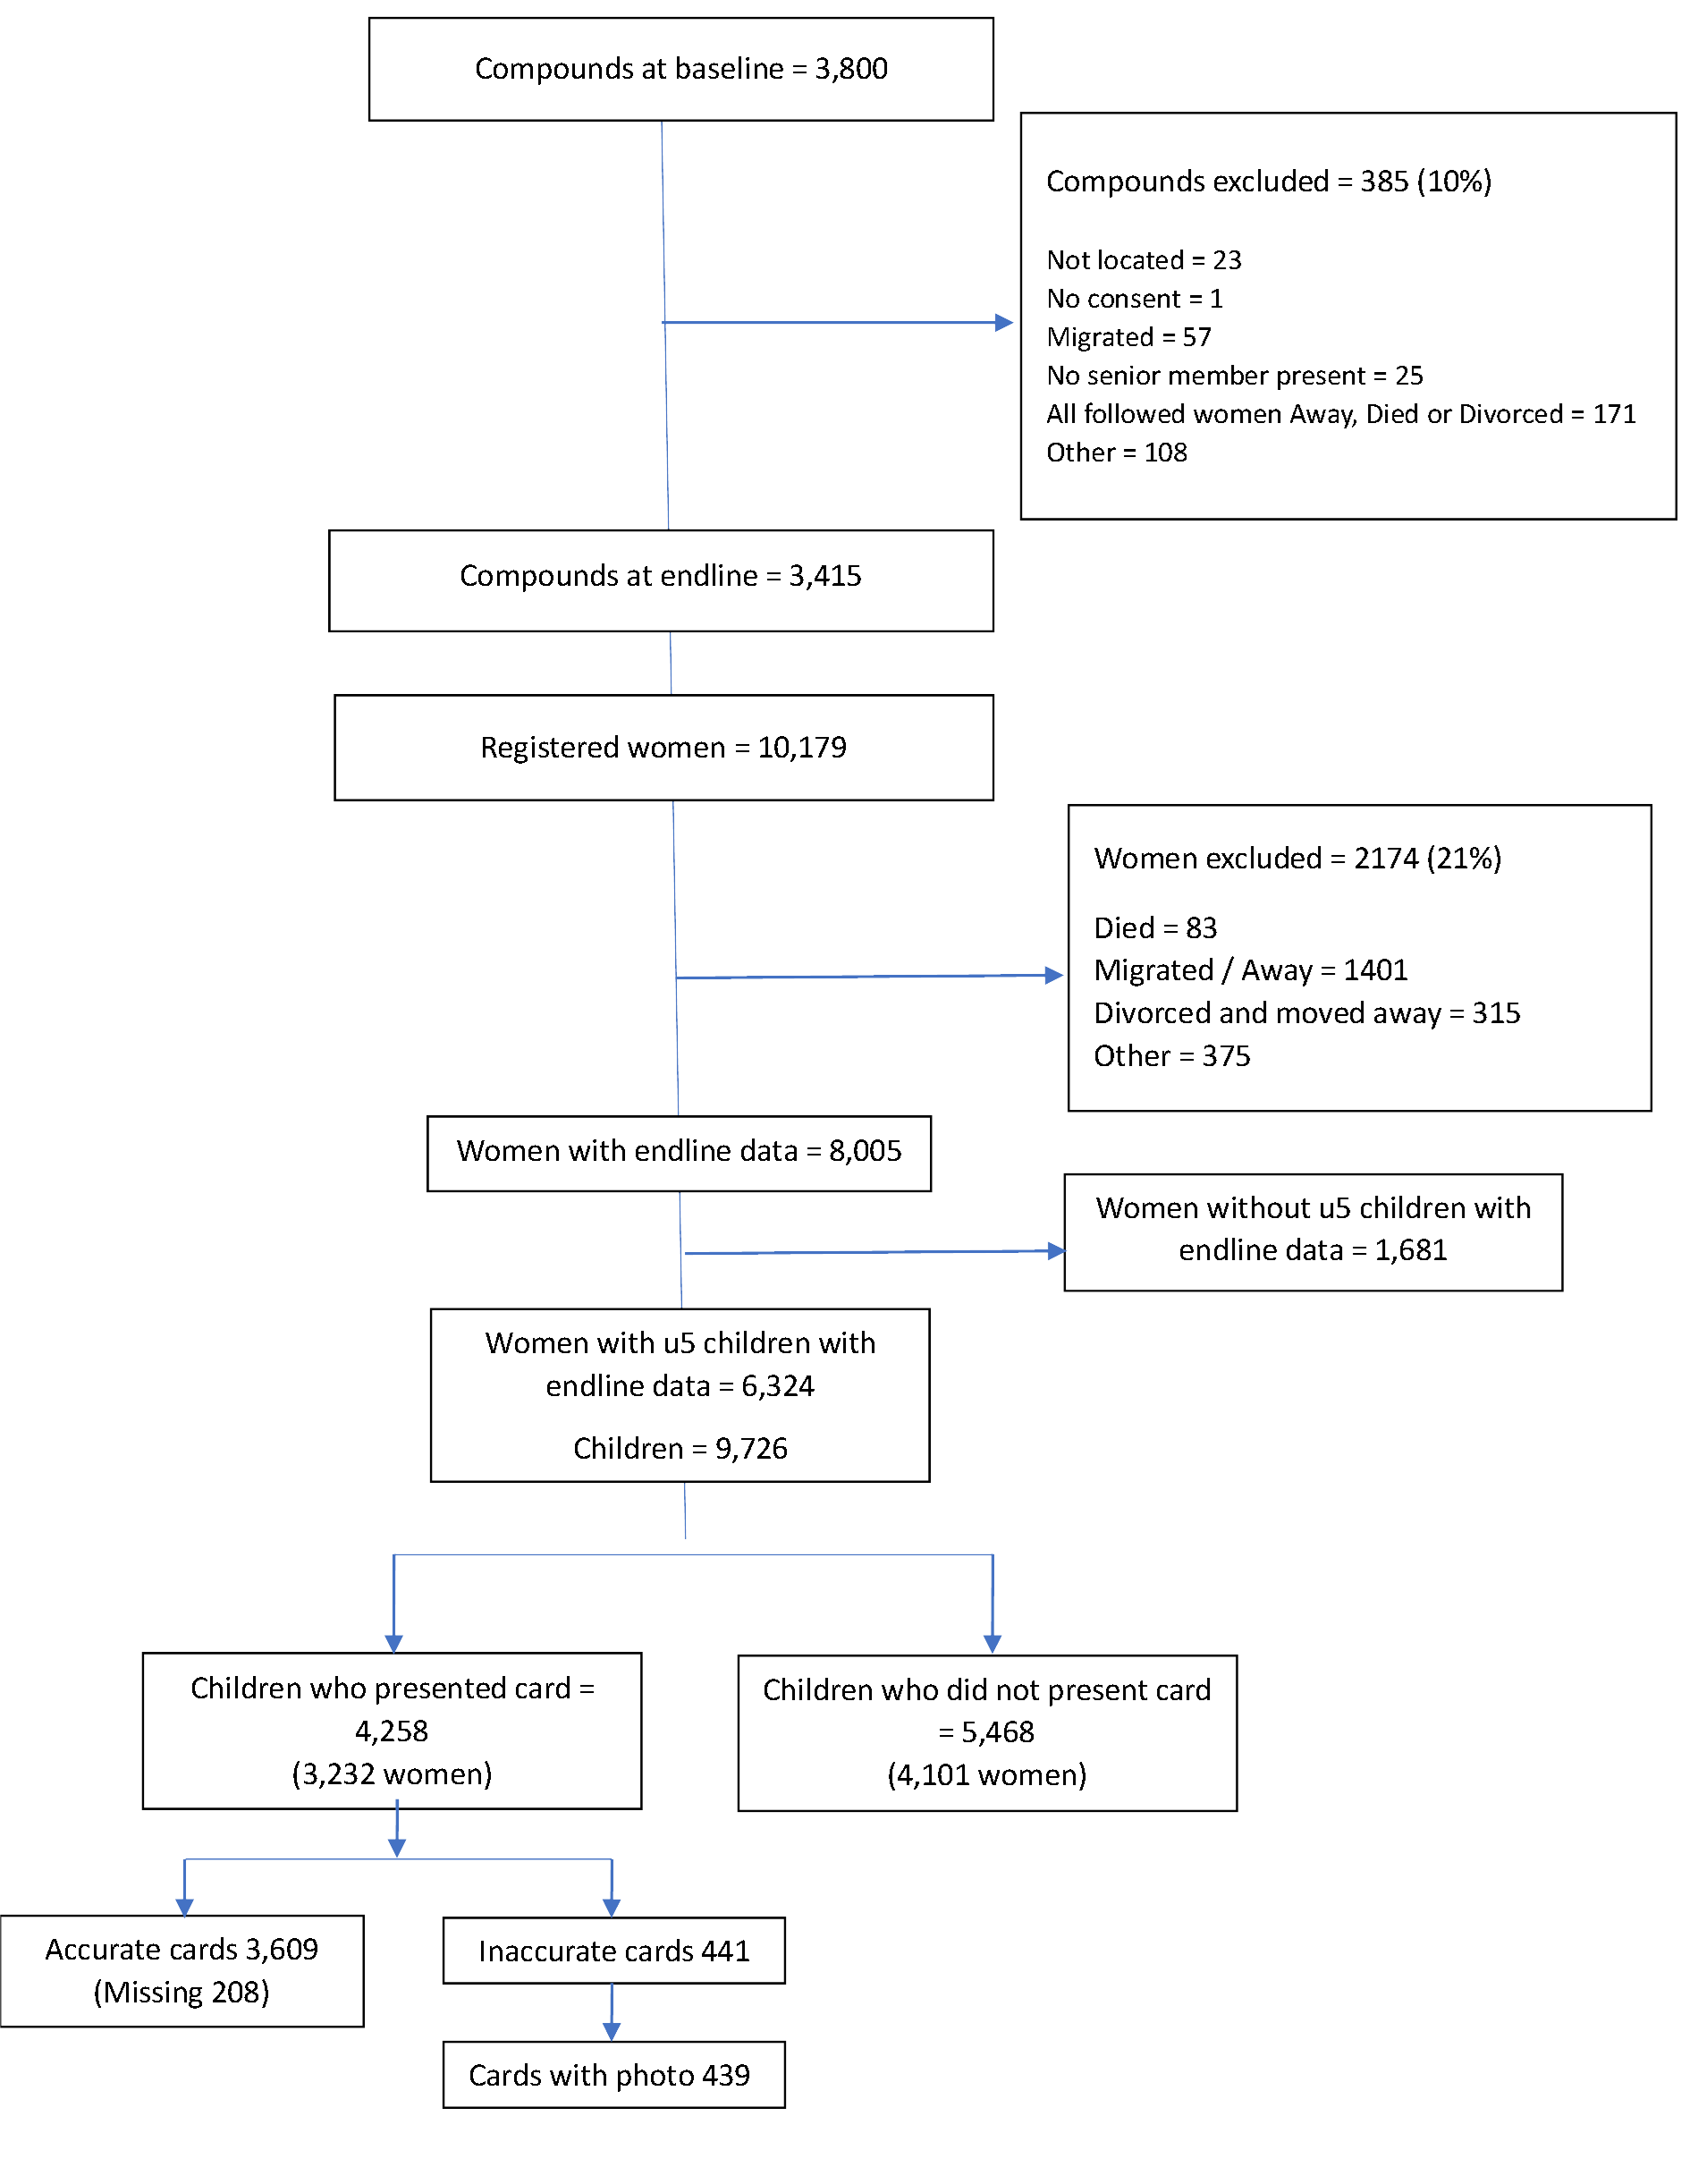


**Supplementary File S1: Vignette Scenariosused for FGDs and IDIs**

*Note – all names and case scenarios were made up*

Good morning everyone, thank you for agreeing to participate in the activity. We will be discussing some issues, many of which can be easily denied but are events we have seen ourselves and have discovered are going on in several communities around us. We will like to hear your thoughts on why these things are happening so we can collectively think of a way to solve the problems.

1. A certain Nurse Hadiza once went to the Masaya community, close to Katuka to vaccinate children. When she arrived at Mallam Abdullahi's compound, she met Mariam, Mallam Abdullahi's wife, who has two children named Isah and Musa. Isah, who is five years old, has stopped collecting child vaccines, but Musa was due for one. The nurse asked for Musa's card, but Mariam couldn't find it; instead, she found the card for the older son (Isah) and gave the Nurse. Musa was vaccinated by the Nurse and his vaccination was recorded in his brother’s card. I will like you to take your time to reflect and this and tell us similar occurrences that you have witnessed in our locality.
   1. What could have been responsible for this kind of action happening around us?
   2. What did the health care workers do in similar situation like this.? **(recycling older children’s cards)**
2. Nurse Sakina was conducting a vaccination outreach in the Sabon Gari community of Katanga. When she arrived at Mallam Hussaini's compound, she vaccinated the children without asking for their vaccine cards
   1. Tell us about similar situations like this that has happened in your community or a nearby community and what you did when that happened.
   2. What is your opinion about this practice? **(Vaccinated without documenting)**
3. Farida Ishaqu brought her twin sons, Hassan and Hussaini, to Gwazaye Hospital in Dumbal, but upon arrival, she realized she had left Hassan's immunization cards at home. Although the nurse on duty vaccinated both children, she recorded the vaccinations on Hussaini's card.
   1. We have seen this happen very well, so what do you do when this happens and what steps have the nurses been taking? **(multi persons on a single vaccination card)**
4. Nurse Fatima, who was dispatched by her hospital supervisor to provide vaccinations to children in Gidan Tsika, a community located in Shuwarin, instead collected the children's cards from the mothers and proceeded to write on them without administering any vaccines. She then departed the community without providing any vaccination services to the children.
   1. What do you do when you see Nurses doing something similar**(documented without vaccinating)**
   2. What was the nurses explanation when you asked what they were trying to do
5. In Fake, a woman gave birth to twin girls, Maida and Maimuna, at a hospital where there was no child vaccine card available. However, Nurse Quadri, one of the nurses on duty went ahead and vaccinated the babies and then recorded the details on a piece of paper which they gave to the mother.  **(substitution in case of card stock out)**
   1. We heard similar things have been happening here, what do you as parents do when there is no card available and what do the Nurses do themselves.
6. Once upon a time in a small village near Maje town, there lived a mother with two young children, Kabiru and Kamoru, who were both three years old and the same gender. Unfortunately, one of the children fell ill with a fever and passed away. The deceased child had a more complete vaccination card than their surviving sibling. When healthcare workers visited the village, they offered some money as a reward for children with up-to-date vaccine records. The mother was then faced with a difficult decision: use the vaccination card of the surviving child, which was not up-to-date, or use the more complete vaccination card of the child who had passed away.
   1. What do mothers in this community do in this type of situation. **(Using a dead child's vaccine card for a living child). Why?**

**Supplemental Table 1: Characteristics of FGD and IDI participants**

| **Characteristics of participants for the FGD** | | | |
| --- | --- | --- | --- |
|  |  | Men (n=16) | Women (n=17) |
| Age |  | 33 to 55 | 16 to 49 |
| Occupation | Trader | 1 | 6 |
|  | Skilled Manual Labour | 3 | 4 |
|  | Farmer | 5 | 2 |
|  | Unskilled Manual Labour | 4 | 3 |
|  | Civil servant | 2 | 2 |
|  | Student | 1 | 0 |
| **Characteristics of participants for the HCW-IDI (n=4)** | | | |
|  | (n=4) |  |  |
| Age | 25 to 31 |  |  |
| Religion | Islam (All) |  |  |
| Qualification | Diploma (All) |  |  |
| Year of experience | 2 to 5 years |  |  |
| Marital status | 1 Married, 3 Single |  |  |

**Supplemental Table 2: Caregiver’s recall by child’s age**

|  | **Has the caregiver confirmed that the vaccine card is accurate** | | |  |
| --- | --- | --- | --- | --- |
| **Child’s age** | Not accurate  N (row %) | Accurate  N (row %) | Not sure  N (row%) | Total  N (%) |
| 0-11 months | 65 (5.5) | 1068 (90.4) | 48 (4.1) | 1181 (100) |
| 12-23 months | 141 (13.7) | 844 (81.9) | 45 (4.4) | 1030 (100) |
| 24-59 months | 235 (11.5) | 1697 (82.9) | 115 (5.6) | 2047 (100) |
|  |  |  |  | Chi-square p-value= <0.001 |

**Supplemental Table 3: Multivariable Logistic Regression Analysis of Under-reporting in Child Vaccination Cards Using Maternal-Level Clustering**

|  | **Outcome: child vaccine card inaccurate (under-reporting of any antigen)** | | | | | | | |
| --- | --- | --- | --- | --- | --- | --- | --- | --- |
|  | **Unadjusted (each variable considered separately)** | | | | **Adjusted (all variables included in one multivariable model)** | | | |
| **Variables** | **Odds ratio** | **95% confidence interval** | | **p-value** | **Odds ratio** | **95% confidence interval** | | **p-value** |
| **Caregiver’s age** |  |  |  |  |  |  |  |  |
| Less than 25 years | ref |  |  |  | ref |  |  |  |
| 25 - 34 years | 1.12 | (0.93 | 1.34) | 0.232 | 1.15 | (0.92 | 1.45) | 0.215 |
| 35 years and above | 1.01 | (0.82 | 1.26) | 0.901 | 1.08 | (0.82 | 1.44) | 0.564 |
| **Age at first marriage** |  |  |  |  |  |  |  |  |
| Less than 16 years | ref |  |  |  | ref |  |  |  |
| 16 years and above | 1.02 | (0.86 | 1.21) | 0.810 | 1.03 | (0.86 | 1.24) | 0.713 |
| **Level of education** |  |  |  |  |  |  |  |  |
| None | ref |  |  |  | ref |  |  |  |
| Informal/religious/Formal | 0.87 | (0.72 | 1.05) | 0.144 | 0.95 | (0.76 | 1.12) | 0.393 |
| **Number of children alive** |  |  |  |  |  |  |  |  |
| Less than 3 | ref |  |  |  | ref |  |  |  |
| 3 – 4 children | 1.04 | (0.84 | 1.29) | 0.681 | 0.94 | (0.73 | 1.20) | 0.634 |
| 5 children and above | 1.01 | (0.82 | 1.24) | 0.911 | 0.91 | (0.68 | 1.21) | 0.515 |
| **Number of under-5 children** |  |  |  |  |  |  |  |  |
| Just 1 | ref |  |  |  | ref |  |  |  |
| 2 and above | 1.11 | (0.93 | 1.32) | 0.234 | 1.07 | (0.88 | 1.29) | 0.479 |
| **Occupation** |  |  |  |  |  |  |  |  |
| Not working/Housewife | ref |  |  |  | ref |  |  |  |
| Farming/Manual labour | 0.83 | (0.66 | 1.05) | 0.115 | 0.61 | (0.68 | 2.80) | 0.072 |
| Business/ professional/TBA | 0.82 | (0.64 | 1.06) | 0.130 | 0.59 | (0.86 | 3.70) | 0.068 |
| **Earn Income** |  |  |  |  |  |  |  |  |
| Earn nothing | ref |  |  |  | ref |  |  |  |
| Earn something | 0.90 | (0.72 | 1.13) | 0.381 | 1.51 | (0.87 | 2.60) | 0.143 |
| **Have co-wife** |  |  |  |  |  |  |  |  |
| None/Only wife | ref |  |  |  | ref |  |  |  |
| More than one | 1.14 | (0.97 | 1.34) | 0.113 | 1.09 | (0.92 | 1.30) | 0.292 |
| **Child birth-order** |  |  |  |  |  |  |  |  |
| Singleton | ref |  |  |  | ref |  |  |  |
| Multiple | 0.95 | (0.54 | 1.66) | 0.865 | 0.98 | (0.53 | 1.79) | 0.946 |
| **Child’s age** |  |  |  |  |  |  |  |  |
| Less than 1 year | ref |  |  |  | ref |  |  |  |
| 12 – 24 months | 0.63 | (0.50 | 0.79) | **<0.001** | 0.63 | (0.49 | 0.80) | **<0.001** |
| 25 months and above | 0.66 | (0.54 | 0.81) | **<0.001** | 0.66 | (0.53 | 0.81) | **<0.001** |
| **Morbidity (sick in the last 2 weeks)** |  |  |  |  |  |  |  |  |
| No | ref |  |  |  | ref |  |  |  |
| Yes | 0.69 | (0.57 | 0.83) | **<0.001** | 0.71 | (0.59 | 0.86) | **<0.001** |
| **Care seeking facility type** |  |  |  |  |  |  |  |  |
| PHC | ref |  |  |  | ref |  |  |  |
| Secondary | 0.97 | (0.75 | 1.26) | 0.822 | 1.02 | (0.78 | 1.34) | 0.852 |
| Tertiary | 0.63 | (0.39 | 1.02) | 0.060 | 0.75 | (0.45 | 1.25) | 0.273 |

**Supplemental Table 4: Multivariable Logistic Regression Analysis of Over-reporting in Child Vaccination Cards Using Maternal-Level Clustering**

|  | **Outcome: child vaccine card inaccurate (over-reporting of any antigen)** | | | | | | | |
| --- | --- | --- | --- | --- | --- | --- | --- | --- |
|  | **Unadjusted (each variable considered separately)** | | | | **Adjusted (all variables included in one multivariable model)** | | | |
| **Variables** | **Odds ratio** | **95% confidence interval** | | **p-value** | **Odds ratio** | **95% confidence interval** | | **p-value** |
| **Caregiver’s age** |  |  |  |  |  |  |  |  |
| Less than 25 years | ref |  |  |  | ref |  |  |  |
| 25 - 34 years | 0.82 | (0.57 | 1.17) | 0.284 | 0.74 | (0.46 | 1.16) | 0.186 |
| 35 years and above | 0.98 | (0.64 | 1.50) | 0.933 | 0.81 | (0.45 | 1.45) | 0.478 |
| **Age at first marriage** |  |  |  |  |  |  |  |  |
| Less than 16 years | ref |  |  |  | ref |  |  |  |
| 16 years and above | 1.07 | (0.77 | 1.47) | 0.695 | 1.11 | (0.78 | 1.57) | 0.564 |
| **Level of education** |  |  |  |  |  |  |  |  |
| None | ref |  |  |  | ref |  |  |  |
| Informal/Religious/Formal | 1.03 | (0.71 | 1.49) | 0.869 | 1.04 | (0.70 | 1.56) | 0.843 |
| **Number of children alive** |  |  |  |  |  |  |  |  |
| Less than 3 | ref |  |  |  | ref |  |  |  |
| 3 – 4 children | 1.21 | (0.79 | 1.83) | 0.370 | 1.53 | (0.95 | 2.44) | 0.079 |
| 5 children and above | 1.15 | (0.76 | 1.76) | 0.488 | 1.54 | (0.87 | 2.73) | 0.133 |
| **Number of under-5 children** |  |  |  |  |  |  |  |  |
| Just 1 | ref |  |  |  | ref |  |  |  |
| 2 and above | 0.70 | (0.50 | 0.97) | **0.033** | 0.64 | (0.44 | 0.92) | **0.015** |
| **Occupation** |  |  |  |  |  |  |  |  |
| Not working/Housewife | ref |  |  |  | ref |  |  |  |
| Farming/Manual labour | 1.30 | (0.81 | 2.06) | 0.267 | 4.91 | (1.10 | 21.95) | **0.037** |
| Business/ professional/TBA | 1.36 | (0.83 | 2.21) | 0.218 | 5.21 | (1.12 | 24.15) | **0.035** |
| **Earn Income** |  |  |  |  |  |  |  |  |
| Earn nothing | ref |  |  |  | ref |  |  |  |
| Earn something | 0.99 | (0.65 | 1.53) | 0.989 | 0.22 | (0.06 | 0.91) | **0.036** |
| **Have co-wife** |  |  |  |  |  |  |  |  |
| None/Only wife | ref |  |  |  | ref |  |  |  |
| More than one | 0.97 | (0.71 | 1.34) | 0.875 | 0.97 | (0.68 | 1.39) | 0.895 |
| **Child birth-order** |  |  |  |  |  |  |  |  |
| Singleton | ref |  |  |  | ref |  |  |  |
| Multiple | 1.77 | (0.73 | 4.32) | 0.206 | 1.91 | (0.71 | 5.14) | 0.200 |
| **Child’s age** |  |  |  |  |  |  |  |  |
| Less than 1 year | ref |  |  |  | ref |  |  |  |
| 12 – 24 months | 0.92 | (0.59 | 1.44) | 0.712 | 0.97 | (0.59 | 1.56) | 0.893 |
| 25 months and above | 1.07 | (0.74 | 1.55) | 0.723 | 1.11 | (0.74 | 1.66) | 0.606 |
| **Morbidity (sick in the last 2 weeks)** |  |  |  |  |  |  |  |  |
| No | ref |  |  |  | ref |  |  |  |
| Yes | 1.37 | (0.96 | 1.95) | 0.080 | 1.36 | (0.94 | 1.98) | 0.098 |
| **Care seeking facility type** |  |  |  |  |  |  |  |  |
| PHC | ref |  |  |  | ref |  |  |  |
| Secondary | 0.97 | (0.56 | 1.69) | 0.919 | 0.94 | (0.55 | 1.61) | 0.820 |
| Tertiary | 1.62 | (0.61 | 4.27) | 0.333 | 1.29 | (0.42 | 4.01) | 0.655 |
